# Supplementary material for: Sustained Complete Remission in Sézary Syndrome using Extracorporeal Photopheresis: A Multicentric Case Series
Source: PubMed Central journal article supplement — Acta Derm Venereol. 2024 Nov 27;104:42348. doi: 10.2340/actadv.v104.42348 (PMC11609723; doi:10.2340/actadv.v104.42348), 2024-11-27
Supplement: ActaDV-104-42348-s1.pdf [file ActaDV-104-42348-s1.pdf]

Supplementary material has been published as submitted. It has not been copyedited, or typeset by Acta Dermato-Venereologica

**Table SI. Summary of studies reporting on extracorporeal photopheresis administered to patients with Sézary syndrome**

| First Author | Year | Treatment regimen <sup>a</sup> | Patients with Sézary syndrome (study population) | Complete remission absolute (%) |
|--------------|------|--------------------------------|--------------------------------------------------|---------------------------------|
| Booken (1)   | 2010 | Combination therapy            | 12 (12)                                          | 0 (0 %)                         |
| Arulogun (2) | 2008 | Monotherapy                    | 13 (13)                                          | 1 (8 %)                         |
| McGirt (3)   | 2010 | Monotherapy                    | 15 (21)                                          | 2 (13 %)                        |
| Atzmony (4)  | 2015 | Combination therapy            | 10 (20)                                          | 3 (30 %)                        |
| Knobler (5)  | 2012 | Monotherapy                    | 14 (39)                                          | 5 (36 %) <sup>b</sup>           |

<sup>a</sup>Either monotherapy or combination therapy was selected into study design of the according studies.

<sup>b</sup>Knobler et al. reported on patients showing a near complete remission with a clearance of skin lesions greater than 90 %.

1. Booken N, Weiss C, Utikal J, Felcht M, Goerdts S, Klemke CD. Combination therapy with extracorporeal photopheresis, interferon-alpha, PUVA and topical corticosteroids in the management of Sézary syndrome. *J Dtsch Dermatol Ges* 2010; 8: 428-438.
2. Arulogun S, Prince HM, Gambell P, Lade S, Ryan G, Eaton E, et al. Extracorporeal photopheresis for the treatment of Sézary syndrome using a novel treatment protocol. *J Am Acad Dermatol* 2008; 59: 589-595.
3. McGirt LY, Thoburn C, Hess A, Vonderheid EC. Predictors of response to extracorporeal photopheresis in advanced mycosis fungoides and Sézary syndrome. *Photodermatol Photoimmunol Photomed* 2010; 26: 182-191.
4. Atzmony L, Amitay-Laish I, Gurion R, Shahal-Zimra Y, Hodak E. Erythrodermic mycosis fungoides and Sézary syndrome treated with extracorporeal photopheresis as part of a multimodality regimen: A single-centre experience. *J Eur Acad Dermatol Venereol* 2015; 29: 2382-2389.
5. Knobler R, Duvic M, Querfeld C, Straus D, Horwitz S, Zain J, et al. Long-term follow-up and survival of cutaneous T-cell lymphoma patients treated with extracorporeal photopheresis. *Photodermatol Photoimmunol Photomed* 2012; 28: 250-257.
